# Supplementary material for: Discriminating miRNA Profiles between Endometrioid Well- and Poorly-Differentiated Tumours and Endometrioid and Serous Subtypes of Endometrial Cancers
Source: PubMed Central journal article supplement (PMC7504607; doi:10.3390/ijms21176071), 2020-08-23
Supplement: ijms-21-06071-s001.pdf [file ijms-21-06071-s001.pdf]

**Table S1.** Target genes of significantly down-regulated miRNAs in more advanced subtypes of endometrial carcinoma.

| EC subtypes                     | Down-regulated miRNAs* | Experimentally validated target genes by reporter assay, Western blot or qPCR                                                                                                                                                                                                                                                                                                                                                                                                                                                                                                                                                                                                                                                                            |
|---------------------------------|------------------------|----------------------------------------------------------------------------------------------------------------------------------------------------------------------------------------------------------------------------------------------------------------------------------------------------------------------------------------------------------------------------------------------------------------------------------------------------------------------------------------------------------------------------------------------------------------------------------------------------------------------------------------------------------------------------------------------------------------------------------------------------------|
| Endometrioid grade 1 vs grade 3 | let-7c-5p              | <i>AGO1, BCL2L1, CEBPB, COPS6, COPS8, DICER1, GPS1, HMGA2, HSPA4, IGF1R, IL6, IL10, ITGB3, MAP4K3, MPL, MTOR, MYC, NRAS, NUMB, PBX2, RICTOR, TGFB1, TNFRSF10B, TRIB2, TRIM71</i>                                                                                                                                                                                                                                                                                                                                                                                                                                                                                                                                                                         |
|                                 | miR-125b-5p            | <i>ABTB1, AHRR, AKT1, ARID3A, ARID3B, BAK1, BBC3, BCL2, BCL2L2, BCL3, BMF, BMPR1B, BTG2, CFB, CCNJ, CDH5, CDKN2A, CSNK2A1, CYP24A1, DGAT1, DUSP6, E2F2, E2F3, EIF4EBP1, EIF5A2, ENPEP, EPO, EPOR, ERBB2, ERBB3, ETS1, FGFR2, GLI1, GRIN2A, GSS, HK2, HMGA1, HMGA2, ICAM2, IGF2, IKZF2, IKZF3, IKZF4, IL6R, IRF4, KLF13, LACTB, LIF, LIN28A, LIN28B, LIPA, MAN1B1, MAP3K11, MAPK14, MCL1, MEGF9, MMP2, MMP13, MMP26, MUC1, MXD1, NCOR2, NES, NKIRAS2, NTRK3, PCTP, PIAS3, PIGF, PIK3CD, PPP1CA, PRDM1, PRKRA, RAF1, RPS6KA1, SCNN1A, SET, SFRP5, SGPL1, SIRT7, SMAD4, SMO, SPHK1, STARD13, STAT3, TBC1D1, TET2, TNFAIP3, TP53, TP53INP1, VDR, VPS4B, VPS51</i>                                                                                            |
|                                 | miR-23b-3p             | <i>ATG12, CA2, CHUK, ETS1, HMGA2, HMGB2, MARCKS, MET, NOTCH1, NOTCH2, PLAUI, PRAP1, PRKACB, PTEN, RRAS2, RUNX2, SRC, TAB2, TAB3, TMEM64, TUSC7, VHL, ZEB1</i>                                                                                                                                                                                                                                                                                                                                                                                                                                                                                                                                                                                            |
|                                 | miR-99a-5p             | <i>AGO2, AKT1, CTDSPL, FGFR3, FKBP5, HOXA1, GRHL1, IGF1R, MTOR, MTMR3, PPP1CB, RAVER2, SERPINE1, SMARCA5, TRIB2</i>                                                                                                                                                                                                                                                                                                                                                                                                                                                                                                                                                                                                                                      |
| Endometrioid vs Serous          | let-7g-5p              | <i>AGO1, AKT2, BCL2L1, BMI1, CASP3, CDKN2A, COL1A2, FN1, GAB2, HMGA2, IGF2BP1, IL13, KRAS, MYC, SMAD2, TBC1D9, TGFB1, THBS1, TNFRSF10B</i>                                                                                                                                                                                                                                                                                                                                                                                                                                                                                                                                                                                                               |
|                                 | miR-195-5p             | <i>ALOX12, ARL2, ATG14, Bace1, BCL2, BCL2L2, BIRC5, BTRC, CAB39, CBX4, CCL4, CCND1, CCND3, CCNE1, CDC25A, CDC42, CDK4, CDK6, CGNL1, CHEK1, CHUK, DICER1, E2F3, ELN, FASN, HMGA1, INSR, KIF21A, KRT7, MBD1, MYB, NKD1, PDIA6, PHACTR2, RAF1, RASGEF1B, RET, RPS6KB1, RUNX2, SNX16, SLC2A3, SMAD7, STRADB, TAB3, TBCCD1, TRIP10, TUFT1, VEGFA, WEE1, WNT7A</i>                                                                                                                                                                                                                                                                                                                                                                                             |
|                                 | miR-34a-5p             | <i>ABLIM1, ACSL1, ACSL4, AIM1, AR, AREG, ARHGDI, AXL, AXIN2, B4GALT5, BAX, BCL2, BIRC5, BMP7, CCL22, CCND1, CCND3, CCNE2, CD24, CD44, CDC25A, CDK4, CDK6, CDKN2A, CDKN2C, CEBPB, CLOCK, CSF1R, CYBB, DDUOK, DLL1, DOCK3, E2F1, E2F3, EPHA5, FOSL1, FOXP1, FUT8, GALNT7, GAS1, GFRA3, GRM7, HDAC1, HNF4A, HOTAIR, HPRT1, IL6R, IFNB1, IMPA1, IMPDH2, INHBB, JAG1, KCNH1, KDM4A, KIT, KLB, KLF4, KLF12, L1CAM, LEF1, LDHA, MAGEA2, MAGEA3, MAGEA6, MAGEA12, MAP2K1, MAP3K9, MARCH5, MDM4, MET, MMP7, MTA2, MYB, MYC, MYCN, NAMPT, NANOG, NCOA1, NOTCH1, NOTCH2, NUMB, PCBP2, PDGFRA, PDGFRB, PEA15, POU5F1, PPP1R10, RICTOR, RNF169, SIRT1, SIRT7, SNAI1, SOX2, SPI1, SRC, STX1A, SYT1, TCF7, TGIF2, TOM1, TP53, ULBP2, VAMP2, VEGFA, WNT1, ZAP70, YY1</i> |
|                                 | miR-497-5p             | <i>BCL2, BIRC5, BTRC, CCND3, CCNE1, CDC25A, CDK4, CHEK1, DICER1, E2F3, EIF4E, HDGF, HSPA4L, IGF1R, KCNN4, MAP2K1, RAF1, RUNX2, SMAD3, WEE1, WNT7A</i>                                                                                                                                                                                                                                                                                                                                                                                                                                                                                                                                                                                                    |

\*miRNAs were down-regulated in both evaluated subtypes compared to controls and statistical difference between expression of compared subtypes was found. Data were adopted from miRTarBase.

**Table S2.** Top ten KEGG pathways comparing 44 genes involved in endometrial carcinoma.

| Pathway  | Term                       | Count | %      | P-Value  | FDR       |
|----------|----------------------------|-------|--------|----------|-----------|
| hsa05213 | Endometrial cancer         | 44    | 100.00 | 1.10E-97 | 2.84E-100 |
| hsa05200 | Pathways in cancer         | 41    | 93.20  | 2.84E-47 | 3.29E-44  |
| hsa05215 | Prostate cancer            | 35    | 79.50  | 1.53E-59 | 1.77E-56  |
| hsa05210 | Colorectal cancer          | 31    | 70.45  | 3.28E-55 | 3.80E-52  |
| hsa05223 | Non-small cell lung cancer | 30    | 68.20  | 2.65E-54 | 3.06E-51  |
| hsa05205 | Proteoglycans in cancer    | 30    | 68.18  | 1.91E-35 | 2.21E-32  |
| hsa0415  | PI3K-Akt signaling pathway | 30    | 68.18  | 2.60E-28 | 3.01E-25  |
| hsa05221 | Acute myeloid leukemia     | 28    | 63.60  | 5.11E-49 | 5.91E-46  |
| hsa04012 | ErbB signaling pathway     | 28    | 63.60  | 1.50E-42 | 1.73E-39  |
| hsa04068 | FoxO signaling pathway     | 27    | 61.36  | 8.50E-35 | 9.83E-32  |

Pathways search was performed with David 6.7 online tool.
